# Supplementary material for: Valorisation Potential of Invasive Acacia dealbata, A. longifolia and A. melanoxylon from Land Clearings
Source: MDPI journal article supplement (doi:10.3390/molecules27207006), 2022-10-18
Supplement: s1 [file s1]

**Supplementary Table S1.** Percentage of recovered biomass after white-rot fungi (WRF) and mild alkaline 0.1M NaOH (ALK) pretreatments.

|             |                           | <b>WRF*-pretreated</b> | <b>ALK-pretreated</b> | <b>WRF* + ALK pretreated</b> |
|-------------|---------------------------|------------------------|-----------------------|------------------------------|
| <b>Leaf</b> | <i>Acacia dealbata</i>    | 94.3%                  | 93.6%                 | 91.7%                        |
|             | <i>Acacia longifolia</i>  | 97.5%                  | 96.8%                 | 94.9%                        |
|             | <i>Acacia melanoxylon</i> | 90.5%                  | 89.0%                 | 84.8%                        |
| <b>Stem</b> | <i>Acacia dealbata</i>    | 96.5%                  | 95.7%                 | 93.2%                        |
|             | <i>Acacia longifolia</i>  | 97.2%                  | 96.5%                 | 94.7%                        |
|             | <i>Acacia melanoxylon</i> | 95.3%                  | 95.0%                 | 94.2%                        |

\* Based on *Pleurotus ostreatus* pretreatment.
